# Supplementary material for: Multi-omic analysis of the cardiac cellulome defines a vascular contribution to cardiac diastolic dysfunction in obese female mice
Source: PubMed Central journal article supplement (PMC10060343; doi:10.1007/s00395-023-00983-6), 2023-03-29
Supplement: 395_2023_983_MOESM1_ESM.pdf [file 395_2023_983_MOESM1_ESM.pdf]

## SUPPLEMENTAL MATERIAL

### **Multi-omic analysis of the cardiac cellulome defines a vascular contribution to cardiac diastolic dysfunction in obese female mice**

Malathi S. I. Dona<sup>1#</sup>, Ian Hsu<sup>1#</sup>, Alex I. Meuth<sup>2,4</sup>, Scott M. Brown<sup>2,4</sup>, Chastidy Bailey<sup>2,4</sup>, Christian G. Aragonez<sup>2,4</sup>, Jacob J. Russell<sup>2,4</sup>, Crisdion Krstevski<sup>1</sup>, Annayya R. Aroor<sup>4,5</sup>, Bysani Chandrasekar<sup>3-5</sup>, Luis A. Martinez-Lemus<sup>3,6</sup>, Vincent G. DeMarco<sup>4,5</sup>, Laurel A. Grisanti<sup>2</sup>, Iris Z. Jaffe<sup>7</sup>, Alexander R. Pinto<sup>1,8\*</sup>, Shawn B. Bender<sup>2-4\*</sup>

<sup>1</sup>Baker Heart and Diabetes Research Institute, Melbourne, Victoria, Australia

<sup>2</sup>Biomedical Sciences and <sup>3</sup>Dalton Cardiovascular Research Center; University of Missouri, Columbia, Missouri, USA

<sup>4</sup>Research Service, Harry S Truman Memorial Veterans Hospital, Columbia, Missouri, USA

<sup>5</sup>Medicine and <sup>6</sup>Medical Pharmacology & Physiology, University of Missouri School of Medicine, Columbia, Missouri, USA

<sup>7</sup>Molecular Cardiology Research Institute, Tufts Medical Center, Boston, Massachusetts, USA

<sup>8</sup>Centre for Cardiovascular Biology and Disease Research, La Trobe University, Melbourne, Australia

#Equal contribution

*Running title:* Vascular role in cardiac dysfunction in obesity

#### **\*Correspondence:**

Shawn B. Bender, Ph.D.  
Harry S. Truman Memorial Veterans' Hospital  
and University of Missouri  
Biomedical Sciences  
E102 Vet Med Bldg  
Columbia, MO 65211  
Phone: 573-814-6000 x53731  
Fax: 573-884-6890  
Email: benders@missouri.edu

Alexander R. Pinto, Ph.D.  
Baker Heart and Diabetes Institute  
75 Commercial Rd  
Prahran, Victoria  
Australia 3004  
Phone: +61 8532 1111  
Email: alex.pinto@baker.edu.au

Online Resource 1. Primer sequences for real-time quantitative PCR

| Gene Name                | Primer Sequence (5' → 3') |                          |
|--------------------------|---------------------------|--------------------------|
|                          | Forward                   | Reverse                  |
| <b>ITGAX</b><br>(CD11c)  | CTGGATAGCCTTTCTTCTGCTG    | GCACACTGTGTCCGAACTC      |
| <b>ADGRE1</b><br>(F4/80) | CTTTGGCTATGGGCTTCCAGTC    | GCAAGGAGGACAGAGTTTATCGTG |
| <b>GAPDH</b>             | TCACCACCATGGAGAAGGC       | GCGAAGCAGTTGGTGGTGCA     |
| <b>ICAM-1</b>            | AACCGCCAGAGAAAGATCAG      | TGTGACAGCCAGAGGAAGTG     |
| <b>PECAM-1</b>           | GAGCCCAATCACGTTTCAGTTT    | TCCTTCCTGCTTCTTGCTAGCT   |
| <b>TNF-α</b>             | GCCTCTTCTCATTCTGCTTG      | CTGATGAGAGGGAGGCCATT     |
| <b>VCAM-1</b>            | CTTCATCCCCACCATTGAAG      | TGAGCAGGTCAGGTTACAG      |

Online Resource 2. Phenotypic characteristics of study animals by group

|                             | Control    | Western     | Western<br>+ Spiro |
|-----------------------------|------------|-------------|--------------------|
| Body Weight (g)             | 22.0 ± 0.7 | 25.7 ± 1.0* | 25.0 ± 0.9*        |
| Periovarian Fat Weight (mg) | 431 ± 50   | 834 ± 186*  | 790 ± 113*         |

Values are mean ± SE, n=7/group; \*p<0.05 vs Control.

Online Resource 3. Phenotypic characteristics of study animals by group

|                                | MR-Intact<br>Control | MR-Intact<br>Western | SMC MR KO<br>Control | SMC MR KO<br>Western |
|--------------------------------|----------------------|----------------------|----------------------|----------------------|
| Body Weight (g)                | 22.3 ± 0.5           | 29.9 ± 1.0*          | 21.5 ± 0.3           | 26.8 ± 1.0*†         |
| Heart Weight (mg)              | 114 ± 3              | 123 ± 4*             | 113 ± 2              | 121 ± 3*             |
| HW/TL                          | 64 ± 2               | 69 ± 2*              | 63 ± 1               | 67 ± 1*              |
| Periovarian Fat Weight (mg)    | 740 ± 82             | 2104 ± 147*          | 676 ± 57             | 1540 ± 153*†         |
| Systolic Blood Pressure (mmHg) | 120 ± 7              | 119 ± 7              | 117 ± 8              | 124 ± 7              |
| Pulse Wave Velocity (cm/s)     | 3.8 ± 0.4            | 3.8 ± 0.3            | 3.5 ± 0.2            | 3.9 ± 0.2            |
| <i>Plasma Parameters</i>       |                      |                      |                      |                      |
| Blood Glucose (mg/dl)          | 156 ± 11             | 183 ± 10*            | 137 ± 7              | 191 ± 8*             |
| Plasma Insulin (pg/ml)         | 172 ± 25             | 266 ± 50**           | 116 ± 24             | 319 ± 35*            |
| Plasma Cholesterol (mg/dl)     | 75 ± 4               | 115 ± 7*             | 70 ± 5               | 110 ± 7*             |
| Plasma Triglycerides (mg/dl)   | 53 ± 6               | 56 ± 2               | 47 ± 5               | 51 ± 9               |
| Plasma Potassium (mEq/ml)      | 4.0 ± 0.2            | 3.8 ± 0.1            | 4.0 ± 0.2            | 4.0 ± 0.2            |
| Plasma Aldosterone (pg/ml)     | 763 ± 70             | 1159 ± 160*          | 800 ± 61             | 1315 ± 152*          |
| <i>Urine Parameters</i>        |                      |                      |                      |                      |
| Proteinuria (mg/mg creatinine) | 1.3 ± 0.2            | 2.2 ± 0.2*           | 1.1 ± 0.1            | 2.3 ± 0.3*           |
| BUN (mg/dl)                    | 2916 ± 398.2         | 4184 ± 538*          | 2149 ± 117           | 4222 ± 422*          |

Values are mean ± SE, n=5-23; \*p<0.05 vs genotype control, \*\*p=0.08 vs genotype control, †p<0.05 vs MR-intact Western

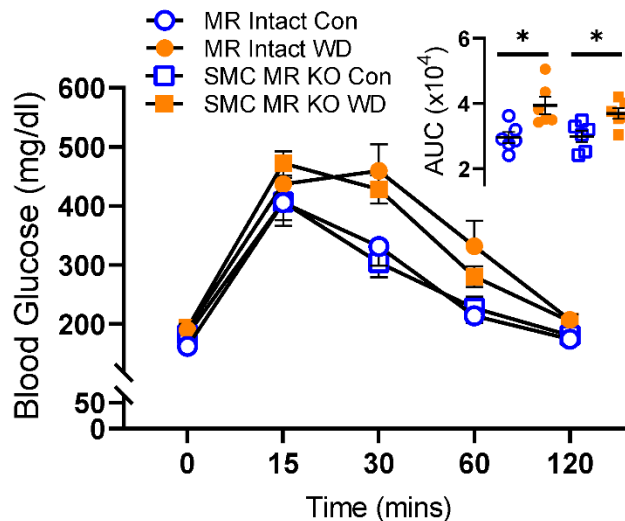

Online Resource 4. Smooth muscle cell mineralocorticoid receptor knockout (SMC-MR-KO) does not prevent western diet (WD)-induced glucose intolerance in female mice. Glucose excursions over time during a glucose tolerance test (ip, 1 g/kg) and glucose area under the curve (AUC; inset) in MR-intact and SMC-MR-KO mice fed control (Con) and WD for 16 weeks. Values are mean±SE with individual data points shown (inset), n=6/group, \*p<0.05 for indicated comparison.

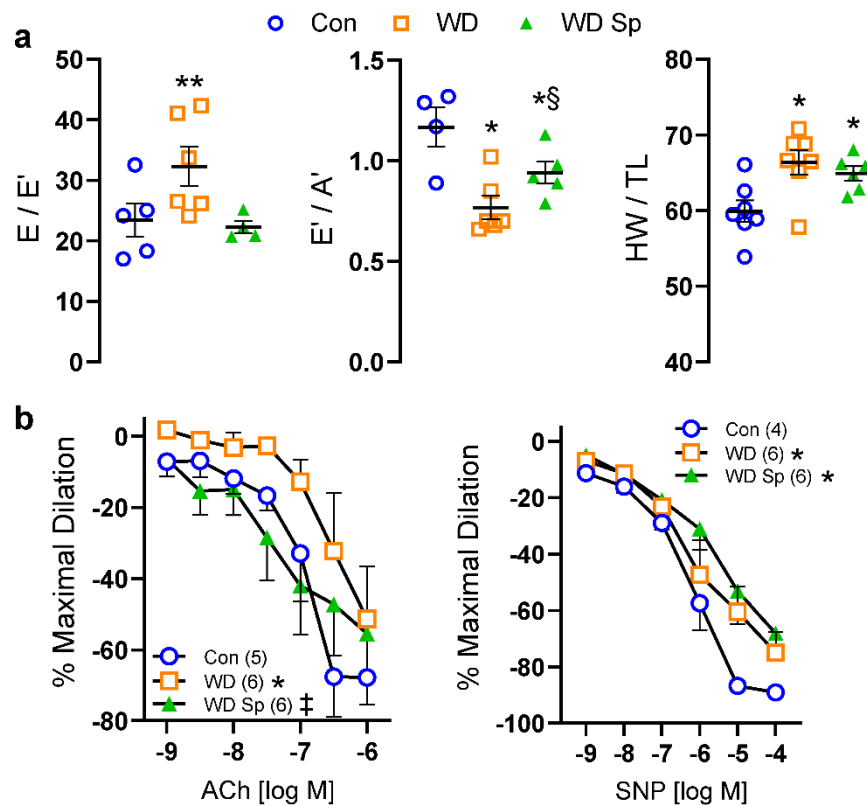

**Online Resource 5. Systemic mineralocorticoid blockade with spironolactone (Sp) prevents western diet (WD)-induced cardiac and coronary vascular dysfunction in female mice. (A)** Indices of cardiac diastolic function, specifically estimated left ventricular filling pressure ( $E/E'$ ) and early-to-late diastolic septal annulus motion ratio ( $E'/A'$ ), and cardiac weights (heart weight-to-tibia length ratio; HW/TL) in Con and WD fed mice. **(B)** Vasodilator responses of isolated coronary arteries to endothelium-dependent (acetylcholine, ACh) and -independent (sodium nitroprusside, SNP) agonists. Values are mean $\pm$ SE with individual data points shown (A) and sample size indicated in parentheses (B); \* $p$ <0.05 versus Con, \*\* $p$ <0.05 versus all other groups, ‡ $p$ <0.05 versus WD, § $p$ =0.08 versus WD.

**Online Resource 6. Cardiac function outcomes by experimental group**

| Parameter                       | Control      | Western      | Western + Spiro |
|---------------------------------|--------------|--------------|-----------------|
| Heart Rate (bpm)                | 542 ± 32     | 512 ± 27     | 525 ± 9         |
| <i>Morphological parameters</i> |              |              |                 |
| SWTd (mm)                       | 0.82 ± 0.03  | 0.89 ± 0.09  | 0.86 ± 0.04     |
| PWTd (mm)                       | 0.71 ± 0.03  | 0.81 ± 0.03§ | 0.73 ± 0.05     |
| LVIDd (mm)                      | 3.58 ± 0.07  | 3.98 ± 0.13* | 3.55 ± 0.12†    |
| LVIDs (mm)                      | 1.98 ± 0.16  | 2.38 ± 0.16  | 2.01 ± 0.16     |
| RWT                             | 0.43 ± 0.01  | 0.43 ± 0.04  | 0.45 ± 0.02     |
| LA (mm)                         | 1.65 ± 0.09  | 2.02 ± 0.05* | 1.97 ± 0.12*    |
| Ao (mm)                         | 1.40 ± 0.04  | 1.49 ± 0.09  | 1.48 ± 0.04     |
| LA/Ao                           | 1.18 ± 0.06  | 1.39 ± 0.10§ | 1.33 ± 0.07     |
| <i>Diastolic parameters</i>     |              |              |                 |
| E (m·s <sup>-1</sup> )          | 531.4 ± 28.7 | 602.3 ± 14.8 | 639.2 ± 33.8    |
| E' (m·s <sup>-1</sup> )         | 23.7 ± 2.5   | 19.6 ± 1.9   | 26.4 ± 2.9      |
| A' (m·s <sup>-1</sup> )         | 21.5 ± 2.0   | 25.5 ± 1.9   | 27.8 ± 2.0      |
| E/E'                            | 23.4 ± 2.8   | 32.3 ± 3.3*  | 22.2 ± 1.0†     |
| E'/A'                           | 1.17 ± 0.10  | 0.77 ± 0.06* | 0.94 ± 0.06*‡   |
| IVRT (ms)                       | 12.7 ± 0.9   | 12.7 ± 0.9   | 13.0 ± 0.9      |
| <i>Systolic parameters</i>      |              |              |                 |
| EF (%)                          | 75 ± 4       | 71 ± 3       | 76 ± 3          |
| FS (%)                          | 44 ± 3       | 40 ± 2       | 45 ± 3          |

SWTd, septal wall thickness-diastole; PWTd, posterior wall thickness-diastole; RWT, relative wall thickness; LVIDd, LV inner dimension-diastole; LVIDs, LV inner dimension-systole; EF, ejection fraction; FS, fractional shortening; LA, left atrial diameter; Ao, aortic diameter; A', peak late septal annular velocity; E', early peak septal annular velocity; IVRT, isovolumic relaxation time; E, velocity of early mitral inflow; E/E' index of LA filling pressure; MPI, myocardial performance index. Values are mean ± SE, N=4-6. \*p<0.05 versus Control; †p<0.05 versus Western Diet; ‡p=0.08 versus Western Diet; §p=0.07 versus Control.

*Online Resource 7. Cardiac function outcomes by experimental group*

| Parameter                       | MR-Intact Control | MR-Intact Western | SMC MR KO Control | SMC MR KO Western |
|---------------------------------|-------------------|-------------------|-------------------|-------------------|
| Heart Rate (bpm)                | 423 ± 12          | 424 ± 14          | 406 ± 18          | 434 ± 16          |
| <i>Morphological parameters</i> |                   |                   |                   |                   |
| SWTd (mm)                       | 0.77 ± 0.03       | 0.91 ± 0.03*      | 0.70 ± 0.03       | 0.81 ± 0.03‡      |
| PWTd (mm)                       | 0.68 ± 0.02       | 0.77 ± 0.03*      | 0.70 ± 0.04       | 0.74 ± 0.03       |
| LVIDd (mm)                      | 3.51 ± 0.09       | 3.47 ± 0.08       | 3.49 ± 0.10       | 3.49 ± 0.08       |
| LVIDs (mm)                      | 2.37 ± 0.12       | 2.23 ± 0.07       | 2.41 ± 0.10       | 2.30 ± 0.10       |
| RWT                             | 0.42 ± 0.02       | 0.49 ± 0.01*      | 0.40 ± 0.02       | 0.45 ± 0.02‡      |
| LA (mm)                         | 1.59 ± 0.06       | 1.74 ± 0.09       | 1.40 ± 0.07       | 1.53 ± 0.06†      |
| Ao (mm)                         | 1.43 ± 0.09       | 1.32 ± 0.03       | 1.35 ± 0.09       | 1.31 ± 0.03       |
| LA/Ao                           | 1.14 ± 0.08       | 1.33 ± 0.07*      | 1.05 ± 0.05       | 1.18 ± 0.04†      |
| <i>Diastolic parameters</i>     |                   |                   |                   |                   |
| E (m·s <sup>-1</sup> )          | 477.1 ± 18.2      | 551.9 ± 16.9*     | 539.2 ± 17.4      | 571.6 ± 22.9      |
| E' (m·s <sup>-1</sup> )         | 19.5 ± 0.8        | 18.5 ± 1.4        | 21.0 ± 1.4        | 23.1 ± 1.9†       |
| A' (m·s <sup>-1</sup> )         | 16.9 ± 0.8        | 19.9 ± 1.1§       | 19.0 ± 0.9        | 20.1 ± 1.3        |
| E/E'                            | 25.2 ± 0.8        | 30.6 ± 1.9*       | 26.3 ± 1.5        | 24.9 ± 1.6†       |
| E'/A'                           | 1.20 ± 0.04       | 0.86 ± 0.05*      | 1.12 ± 0.07       | 1.17 ± 0.08†      |
| IVRT (ms)                       | 15.4 ± 0.7        | 16.8 ± 1.0        | 15.1 ± 1.1        | 14.2 ± 0.8        |
| <i>Systolic parameters</i>      |                   |                   |                   |                   |
| EF (%)                          | 61 ± 2            | 66 ± 2§           | 60 ± 2            | 62 ± 2            |
| FS (%)                          | 33 ± 2            | 35 ± 2            | 31 ± 1            | 33 ± 1            |

SWTd, septal wall thickness-diastole; PWTd, posterior wall thickness-diastole; RWT, relative wall thickness; LVIDd, LV inner dimension-diastole; LVIDs, LV inner dimension-systole; EF, ejection fraction; FS, fractional shortening; LA, left atrial diameter; Ao, aortic diameter; A', peak late septal annular velocity; E', early peak septal annular velocity; IVRT, isovolumic relaxation time; E, velocity of early mitral inflow; E/E' index of LA filling pressure; MPI, myocardial performance index. Values are mean ± SE, N=9-14. \*p<0.05 versus MR-Intact Control; †p<0.05 versus MR-Intact Western; ‡p<0.05 versus SMC MR KO Control; §p=0.07 versus MR-Intact Control.

*Online Resource 8. Diameters of isolated coronary vessels by experimental group*

|               | Control           | Western           | Western + Spiro   |                   |
|---------------|-------------------|-------------------|-------------------|-------------------|
| Diameter (µm) | 243 ± 4           | 257 ± 9           | 256 ± 6           |                   |
|               | MR-Intact Control | MR-Intact Western | SMC MR KO Control | SMC MR KO Western |
| Diameter (µm) | 201 ± 10          | 226 ± 8           | 214 ± 7           | 212 ± 8           |

Values are mean ± SE, n=5-14; Diameter calculated from circumference following the normalization procedure.

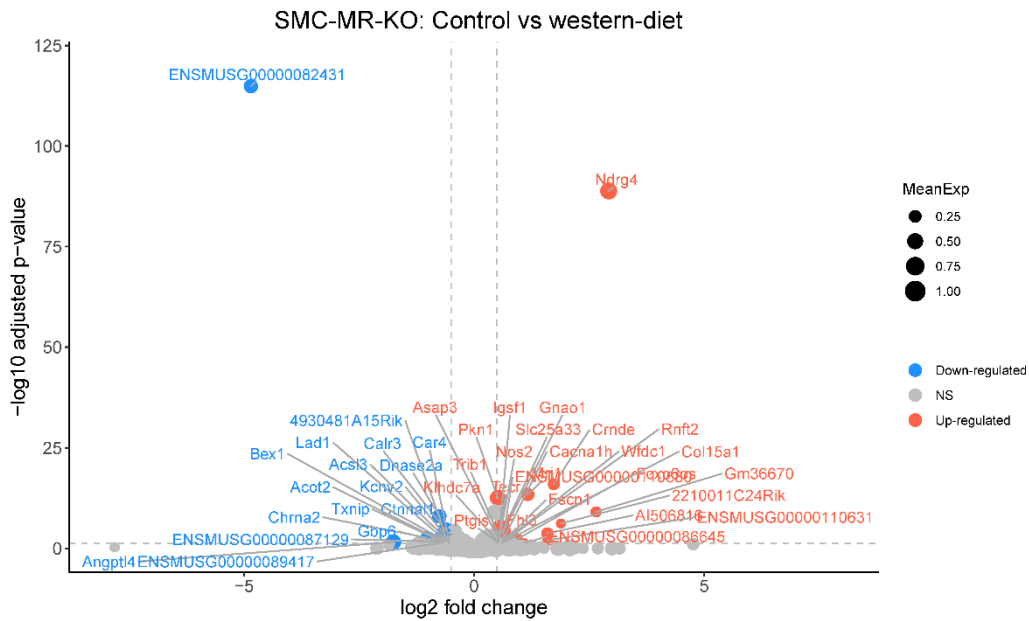

**Online Resource 9.** *Western diet (WD) feeding altered cardiac gene expression in smooth muscle cell mineralocorticoid receptor knockout (SMC-MR-KO) mice.* Analysis of cardiac transcripts (13,565 transcripts) revealed differential expression (log<sub>2</sub> fold change >0.5, corrected p<0.05) of 43 transcripts induced by WD feeding in SMC-MR-KO mice (17 downregulated, blue dots; 26 upregulated, red dots).
