# Supplementary material for: Multi-omic analysis of the cardiac cellulome defines a vascular contribution to cardiac diastolic dysfunction in obese female mice
Source: PubMed Central journal article supplement (PMC10060343; doi:10.1007/s00395-023-00983-6), 2023-03-29
Supplement: 395_2023_983_MOESM7_ESM.pdf [file 395_2023_983_MOESM7_ESM.pdf]

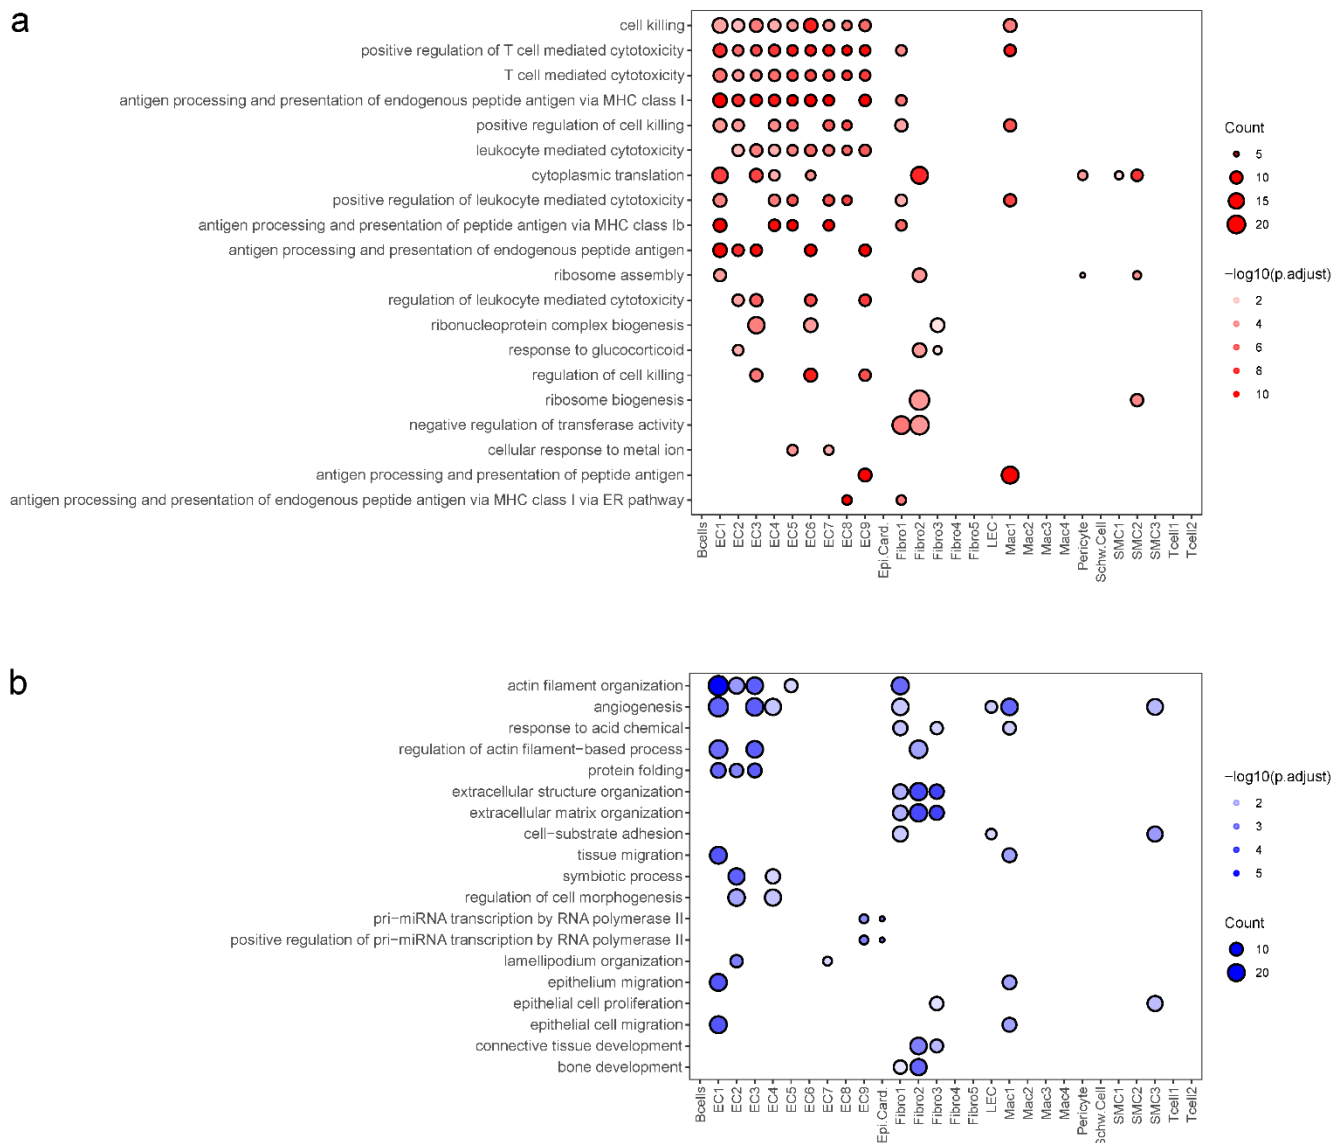

**Online Resource 17. Smooth muscle cell mineralocorticoid receptor knockout (SMC-MR-KO) alters gene programs across cardiac non-myocyte cell populations.** Dot plots summarizing statistically significant gene ontology (GO) terms (corrected  $p < 0.05$ ) enriched among genes differentially up- (a) or down- (b) regulated in each cell population of control diet fed SMC-MR-KO mice versus control diet fed MR-intact mice. Dot color intensity and size indicate significance and number of differentially expressed genes related to each GO term, respectively.
