# Supplementary material for: Multi-omic analysis of the cardiac cellulome defines a vascular contribution to cardiac diastolic dysfunction in obese female mice
Source: PubMed Central journal article supplement (PMC10060343; doi:10.1007/s00395-023-00983-6), 2023-03-29
Supplement: 395_2023_983_MOESM17_ESM.pdf [file 395_2023_983_MOESM17_ESM.pdf]

**A**

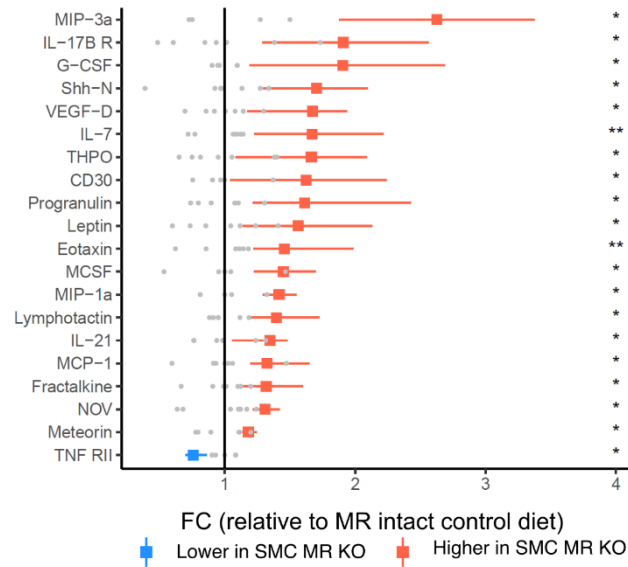

**B**

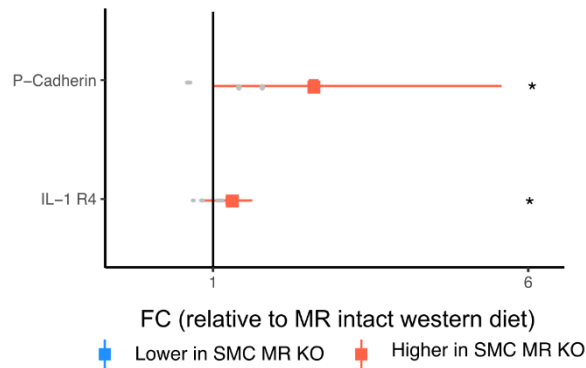

**Online Resource 30. Smooth muscle cell mineralocorticoid receptor knockout (SMC-MR-KO) modulates cardiac cytokines in control diet fed mice. (A)** Differentially expressed cardiac cytokines in control diet fed SMC-MR-KO mice versus control diet fed MR-Intact mice. Black line indicates mean cytokine level in MR-intact mouse hearts. (B) Differentially expressed cardiac cytokines in western diet fed SMC-MR-KO mice versus western diet fed MR-Intact mice. Gray dots indicate individual data points for MR-intact group. Red and blue points indicate cytokines at higher or lower levels (respectively) in SMC-MR-KO hearts, relative to mean of MR-intact mouse hearts. Colored squares indicate mean values with colored lines indicating value range of data points for SMC-MR-KO samples. \* $p < 0.05$ , \*\* $p < 0.01$ .

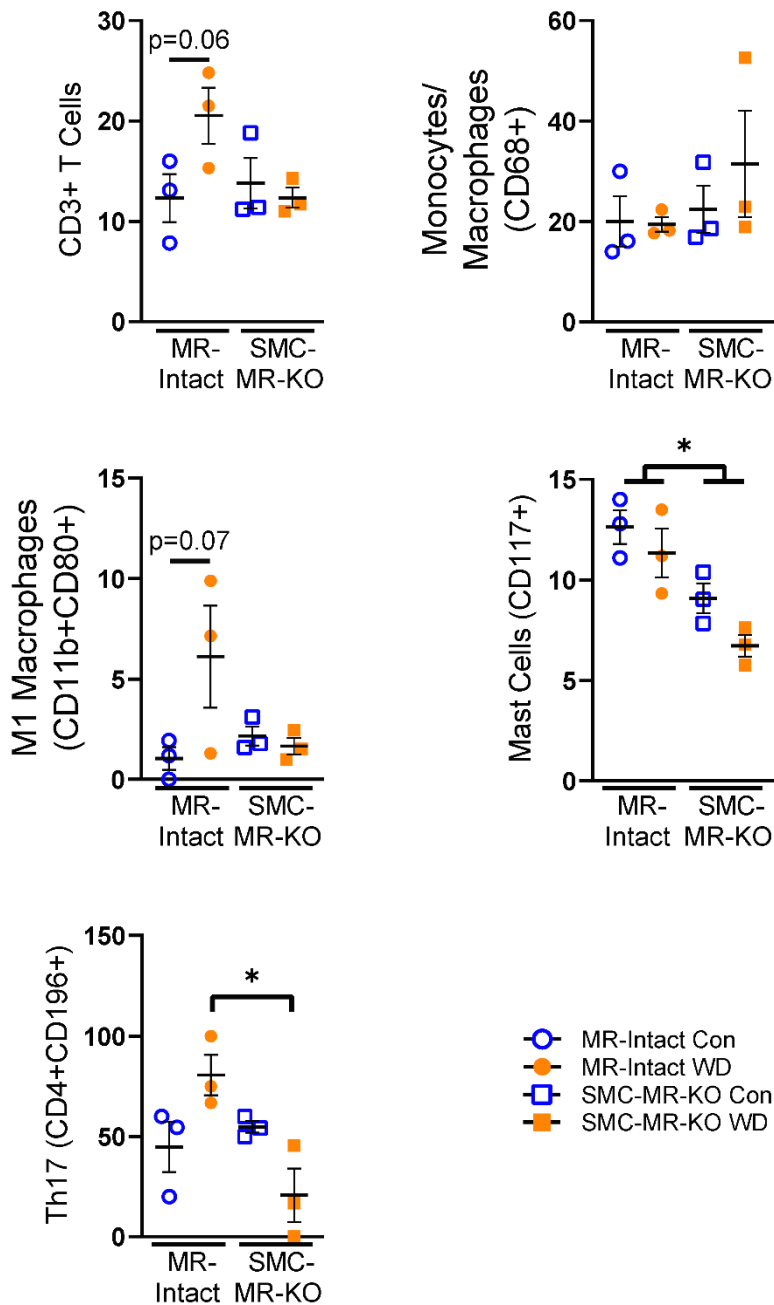

**Online Resource 31.** Smooth muscle cell mineralocorticoid receptor knockout (SMC-MR-KO) prevents western diet (WD)-induced cardiac leukocyte recruitment in female mice. Cardiac leukocytes, specifically CD3+ T cells, CD68+ monocytes/macrophages, CD11b+CD80+ M1 macrophages, CD117+ mast cells, and CD4+CD196+ Th17 cells, assessed by flow cytometry. Values are mean±SE with individual data points shown; \*p<0.05 for indicated comparison.
